# Supplementary material for: Pericentromeric Transcription of Novel Pathogen-Related Human GPS Genes in Cancers is Regulated by C19MC miRNAs, CEBPB, IFN-γ, and IFN-β
Source: Research Square preprint supplement (doi:10.21203/rs.3.rs-8621807/v1), 2026-02-04
Supplement: Supplementary file 1 [file 3d3792bda30a86dbb8938145.docx]

**Supplementary material to:**

**Pericentromeric Transcription of Novel Pathogen-Related Human GPS Genes in Cancers is Regulated by C19MC miRNAs, CEBPB, IFN-γ, and IFN-β**

Goodwin G. Jinesh1,2,*, Isha Godwin3, Marco Napoli1,4, Elsa R. Flores1,4, and Andrew S. Brohl2,5*

**Supplementary figure legends:**

**Figure-S1.** **Paired-end Sanger sequencing of C6GPS mRNA ORF showing no splicing of this intronless mRNA.** Forward and reverse complement sequencing of the C6GPS ORF from cDNA of MCF-7 cells (Top and bottom panels respectively). The light blue shaded regions at the beginning of each panel are the flanking ends of the ORF. Note: This is a mutant sequence from MCF-7 cell line, which is compared to the wild-type reference genome (UCSC Genome Browser).

**Figure-S2.** **Paired-end Sanger sequencing of C17GPS mRNA ORF showing no splicing of this intronless mRNA.** Forward and reverse complement sequencing of the C17GPS ORF from cDNA of MCF-7 cells (Top and bottom panels respectively). The light blue shaded regions at the beginning of each panel are the flanking ends of the ORF. Note: This is a mutant sequence from MCF-7 cell line, which is compared to the wild-type reference genome (UCSC Genome Browser).

**Supplementary table legends:**

**Table-S1. Reference nucleotide sequences of the ORFs of GPS gene family.** All wild-type nucleotide sequences of the ORFs of GPS gene family members are provided in this table with ORF length, and genomic coordinates (based on the Hg19 build of the reference genome: UCSC Genome Browser).

**Table-S2. Reference protein sequences of the GPS gene family.** All wild-type deduced amino acid sequences of the ORFs of GPS gene family members are provided in this table with protein length.
