# Supplementary material for: Pericentromeric Transcription of Novel Pathogen-Related Human GPS Genes in Cancers is Regulated by C19MC miRNAs, CEBPB, IFN-γ, and IFN-β
Source: Research Square preprint supplement (doi:10.21203/rs.3.rs-8621807/v1), 2026-02-04
Supplement: Supplementary file 3 [file f353988757b3424c1b301db3.xlsx]

## Sheet: Sheet1
GPS Gene Symbol	Hg19 coordinates	ORF length	Wild type Nucleotide ORF sequence
C1GPS	chr1:121483354-121483920	566	ATGCTACTGTCTAGTTTTTATGGGCAGTTATATCCTCTCCTGCCAAAGGCCTCAAAGCGGTCCAAATCTCCCCTTTCAGATTCTACCAAAAGTGTGTTTCCAAACGGCTCTATCAAAGGGAATGTTCAACTCTGTGACTTGAATGCAATCATCACAAGGCCGTTTCTCAGAATGCTTCCATGTAGCTTTTATGAGCAGATATTTCCTTTTCCACCCCAGGCCTCGAAGCCCTCCAAATGTCCCCTTGCAGATGCTAGAAAGAGAGGGTTTCAAAGCTGCTCTATCAAAAGGAAAGTACAACTCTGTGAGTTGAATCCAAATATCACAAAGAAGTTCCTGAGCATGCTTCCGTTTAGCTTTTATGGGAAGATAATCCCTTTTCCATCGAAATGTTCAAAG…
C2GPS	chr2:92280754-92281068	314	ATGAGAATACTTCTGTATAGTTTTTATGCGAAGATATTCCCTTTTTCACCACACGCCTCAAAGCGATCCAAAAGTCCACTTCCAGATGCAACAAAAAGAGTGTTTCAAACCTGCTCTATGTATGGGAATATTCAACTCTGTGACTTGAAGGCTAATATCCCAAAGATGTTTCCGAGAATGCTTTTGTCTAGATTTTATAGGAAGATATTCCCTTTTCCAAAGAAATCCTCAAAACTTTCCAAATATCCACATGCAGATTCCACAAAAAGAGTGTTTCAAAACTACTCTATGAAAAGAAAGGTTCAGCTCTGTTAG
C3GPS	chr3:90472886-90473455	569	ATGTTTCTCAAAATGCTTCTGACTAGTTTTTATGTGAGGATATTCCCGTTTCCACCTCAGACCTCAAAACCCTACAAATGTCCACATGCAGATTCTACAAAAAGAGTGTTTCAAAACTGCTGTATCAACAGGAACGTTCAACTCTGTGAGTTGAATGCACAGATCACAAAGAAGTTTCTGAGAATTCTTTTAAATAGTTTTTATTTGAAGATATTCCCATTTCCAAATAAGGCCTCAAAGCGGTCCAAATATCCACTTGCAGAGTCTTCAAAAAGAGTGTTTCAAAAATGCCATATCAAAAGGATGGTTCAACTCTGTGAGTTGAATGCACACATCACAAAGAAGTCTCTGAGAATGCTTCAGTCTAATTATTTGAAGACATTCCCTTTTCCAACGAAT…
C5GPS	chr5:46351705-46352265	560	ATGCTTCTGTCTAGTTTTTATGTGAAGATATTCCCCTTTCCAACGAAGGCCTCAAATCAGTCCAAATATCCACTTGCAGATTCTAAAAAAAGAGTGTTTCAAAACGGCTCTATCATAAGGAAGGTTCAACTCTATGAGTTGAATGCACACATCACAAAGAAGTTTCTGAGAATGCTTCTGTCAAGTTTCTATGTGAAGATATTTCCTTGTCTACCATCGCCCTCAAAGCCTTCAAAATGTCCACTTGCAGATTCTGCAAATAGAGTGTTTCAAAACTTTTCTATCAAAAGGAAGGTTCAAATCTGTGAGTTGAATGCACACATCATGAAGAAGTTTCTGAGAATTTTTCTATCAAGTTTTTATGAGAAGATATACCCGTTTCCAATGAAGGCCACAAAC…
C6GPS	chr6:58778505-58779128	623	ATGGGAAGATATTTCCTTTTCTACCATAGGCTTCAAGGCGCTCTAATATCCGCTTGGAAATACTACAACCACAGCGTTTCAAACTGCTCTATCCAAAGGAAGGTTCCACTCTGTGACTTGAGTGCACACAACCAAAGAAATTTCGGAGAATTCTTCTGTCTAGATTTATACGAAGAAATCCCGTTTCCAACGAAGACCCAAAGGAGGTCCAAATATCCACTTGCAGATCCTTCAGAAAGAGGGTTTCAAAACTGCTCTATCAAGAGAAATGTTCAACTCTGTGAGTTGAATGCAGACATCACAAAGTCGTTTCTGAGATTGGTTCTGTCTAGGTTTTATGAGAAGATATTTCCTTTTCTACCATACGCTTCAAGGCGTTCCAAATATCCGCTTGGAAAT…
C7GPS	chr7:61085092-61085676	584	ATGAAGGCCTCAAAGCAGTCTAAATATCCACTTGCAAATTCTACGAAAAGAGTGTTTCAGTACTGCTCTATGAAGAGATATGTTCAACTCTGTGAGTTGAATGCAAACATCACAAAGAATTTACCTAGAATGCTTCTGTCTAGTTTTTATGTGAAGATACTCCCGTTTCCAATAAAAGCCTCAAAGCTATACAAATATCCACTTGCAGATTCTACAAAAAGAGTGTTTCAAAACTGCTATAAAAAAAGAAAGGTTCAAATCTGTGAGTTGAGTACACACATCACAAAGAAGTTTCTGAGAATGATTCTGCCTAGTTTTTATGGGAAGATATTTCCTTTTTCACCACAGGCCTCAAAGCGCTCCAAATGTTCACTTCCAGATACTACAAAAAGAGTGTTT…
C8GPS	chr8:43770305-43770781	476	ATGCTTCTGTCTAGTTTTTATGTTAACGTATCCCCGTTTCCACCGAAGGCCTCAAAGCACTCCAAATATCCACCTTCAGATTCTACAAAAAGAGTGTTTCAAAAGTGCTCTATCAAAAGGAAGGCTCAACTCTGTGAGTTGAATTCACACATCACAAAGCAGTCTCTGAGAATGCTTCTGTCTAGTTTTTATGTGAAGATATTCCCATTTCCACCGAAGGCCTCAAAGCGCTCCAAATATCCACTTGCAGATTCCACAAAAAGAGTGTTTCAAAACTGTTCTACCAAAAGGAAGGCTCAAATCTGTGAGTTGAATGCACACATCACAAAGAAGTTTCTGAGAATGCTTCTGTCTAGTTTTTATGTGAAGATATTCCCGTTTCCACTGAAGGCCTCAAAG…
C9GPS1	chr9:69708274-69708585	311	ATGCTTCTGTCTAGTCTTTATGTGAAGGTATTCCCGTTTCCAGCGAAGGCCTCAGAGCGGTCCAAATATCCCCTTACGAAGTCTACTAAAAGAGTGTTTCAAAACTGCTCTATGATAAGGTATGTTCAAATCTGTGGGTTGAATGCAAACATCACAAAGAAGTTTCTGAGAATGCTTCTGTCTAGTTTTTATTTGAAGTTATTTCCTTTTCCACCATTGGCCTCAAAGTGCTGCAAATGTCCACTTGCAGATTCTACAAAAAAGTATTTCAAACCTGCTCTATCAAAAGAAAGGTTCAACTCTCTGAGTTGA
C9GPS2	chr9:66973756-66974067	311	ATGCTTCTGTCTAGTCTTTATGTGAAGGTATTCCCGTTTCCAGCGAAGGCCTCAGAGCGGTCCAAATATCCCCTTACGAAGTCTACTAAAAGAGTGTTTCAAAACTGCTCTATGATAAGGTATGTTCAAATCTGTGGGTTGAATGCAAACATCACAAAGAAGTTTCTGAGAATGCTTCTGTCTAGTTTTTATTTGAAGTTATTTCCTTTTCCACCATTGGCCTCAAAGTGCTGCAAATGTCCACTTGCAGATTCTACAAAAAAGTATTTCAAACCTGCTCTATCAAAAGAAAGGTTCAACTCTCTGAGTTGA
C10GPS	chr10:42411819-42412208	389	ATGCTTCTGTCTACTTTTACTGAGAAGATATTTCTTTTTCACTATAGGCCTCAAACGGCTCCGAAATATCCCTTTGCATACTGTACAAAAAGACGTTTTCCAAATTGCTCAATAAAAAGAAAGGTTCCACTCTGTGAAACGAATGTAGGAATCACAAAGAAATTTCTCAGAATGCGTTTGTCTAGTTTTTATGTGCTCATATTTCCTTTTTCACCATGGGCCTCAAAAGGCTCCAAATATCCATTTGCAGATTCTACAGAAAGACTGTTTCCAAACTGCTCAGCCAAAGGAAAGGTTCAACCCTTTGAGATAATTGCACACATCACAAAGATGTTTCTCAGAATGCTTTTGTTTAGTTTTCAGGTGAAAATATTTCCAGTTTCACCATAG
C11GPS	chr11:51591530-51592375	845	ATGAATGTCCAACTCTGTGAGTTGAATGCTATCATCACAGAGTCGTTTCTGAGAGTGCTTCTATGTCGTTTTTATGAGAAGATATTCCCTTTTCCACCACAGTCCACAAAGCCCTCCCAATGTCCACCTGCAGATTTTAGAAAACGAGCATTTCAAAGGTGCTGTATCAGAGGGAAAGTTCGACTCTGTGAGGTGAATGCAAACATCACAAAGAAGTTTCTGAGAATGCTTCGGTTTAGCTTTTATGTGAAGTTTATGCCATTTCCAACGAAATCTTCAAAGAGGTCCAAATATCCACTGGCCGATCCCACAGAAAGAGTGTTTCGAAACTGCTGTTTCAAACGGAATCTTCAACTCTGCGAGTTGAATGCAATCATCACAAAGAAGTTTCTGACAATG…
C12GPS	chr12:34845807-34846241	434	ATGATTCTGTCTAGTTTTTATATGAAGTTATTTCCTTTTCTACCATATGCCTTAATGTGCTTTAAAAATCCACTTGCATATTCTACAAAAAGAGTGTTTCAAAACTGCTCTATCAAAAGCAAGTTTCAAGTCTGTGAGTGGAGTGGAGACTTCACAAAGAAGTTTCTGAGAATACTTCTGTCTGCTTTTTATGTGAAGATATTCCCATTTCCAAAGAAGGCCTCAAAGTGCTCCAAATATCCACTTGAAGACTTTACAAACAGAGTGTTTCAAAAGTGTTCTATCAAAAGAAAGGTTAAACTCTGTGAGTTGAACTCACACATAACAATCAAAAGAAAAGTTAAACTCTGTGAGTTGAATGCACACATCACAAATTATTTTCTGAGAATGATTCTGTCT…
C14GPS	chr14:19020589-19020867	278	ATGGAAAGGTATCTTCAACTCTGTGAGTTGAATGCAAACATCACAAAGACGTTTCTGAGAATGATTCTGTCTAGTTTTTGTGTGAAGATATTTCCTTTTCCACCATACGCCTCAAAGCTCTCCAAATGTCCACTTACAGATTCTACAAAAAGAATATTTCAAATCTACTATATCAAAAGAAACCTTCAACTCTTTGTGTTTAATGAACACATCACAGAGTTGTTTCTGAGAATGCTTCTGTGTAGTTTTTATGAGAAGATAATTCCTTTTCCACCATAG
C15GPS	chr15:20016254-20016676	422	ATGAATGCAGACAACATGCGGAAGTTTCTGAGATTCCTTCTGTCTAGATTTTACGTGAAGATATTGCCTTTTCTACCATTGGCTGCAAAGCTCTCCAAATGTCCACTTGCAGATTCTACAAAAAGAGTATTTCCAAACTGCTCAATCAAAGGAAAGTTTCAACTCTGTGAGATGAACACAGACATCTCAAAGAAGTTTCTCAGAATTCTTCTGTCTAGTTTTTATATGACGATATTAACTTTTCCACCACATGCATCATATTGCTCCAAATGTCCACTTGCAGATTCTACAAAAAGAGAGTTTCAAATCTGCTCTATCAAAGGAAAGCTTTACCTCTTTGAGATGAATGCACACATCACAAAGAAGTTTCTCAGATTGCTTCTGTCTACATTTTATGTG…
C16GPS	chr16:35215994-35216551	557	ATGAATGCACACATCAAGAAGACGTTTTTCAGACTGTTTCTGTCTAGTTTTTATGTGAAGATATTTCCTTCTCCACCACAGTCCTCAAAGTGCTCCAAATATCCATTTGCAAATACTACAAAAAGACAGTTTCCAAACTGCGCAATCAAAAGAAAGGTCGAACTCTGTGAGTTGAATGCACACATCACAATGAAGTTTCTCAGAATGCTTCTGTCTAGTTTTTATGTGAAGATATTTCCTTTTCCACCACAGGCCTCAAAGTGCTCCAAATATCCACCTGCAGATTCTACAGAGAGCATGTTTCAAAGCTGCTCAATCAAAAGAAATGTTCAACTCTGTGAGATGAATGTGCACATCAAAATGAAGTTTCACAGAATGCTTCTGTCTAATTTTTATTTG…
C17GPS	chr17:22252066-22252857	791	ATGCATCTATCTAGTTCTTACGGGAAGATAATTCCTTTTCCACCTCAGGCCTCAAAGCCCTCCAAATATCCACTTGCAGATTCTAGAAAAAGAGTGTTTCAAAGCTTCTCTCTCAAAAGGAAATTTCAACTCTGTGAGTTGAAAGCAAACATCACAAAGAAGTTTCTGAGAATGCTTCTGTTTAGCTTTTCTGTGAAGATTATCCCGTTTCCAACGAAATCTTCAAAGAGGCCCAAACATCCACTTGCAGATGCCACAGAAAGAGTGTTTGGAAACTGCTGTTTGAAAAAGAACCTTCAACTCTGTGAGTTGAATGCAGTCATCACAAACAAGTTTCTGACAATGCTTCTCTCTAGTTTTTACGTGACGATAATTCGTTTTCCACCGCAGGTGGGAAAT…
C18GPS1	chr18:18514027-18514506	479	ATGCTTCTGTGTAGATTTTACATGAATATAGTCCCGTTTCCAAGGAAATCCTTAAAGCCATCCAATTATCCACTTGCAGATTTTACAAAAAGAGTGTTTCAAAACTGCTGTGTAAAAAGAAACGTTCAACTCTGTCAGTTGAGTACACACATCACAAACAAGTTTCTGAGAATGCTTCTGTCTAGTTTTTATGGGAAGATATTTCCTTTTTCTCCAAAGTCGGCAAAGCGCTCCAAAGATCCATTTCCAGATACAACAAAAAGAGTGTTTCAAACCAGCTCTATGAAAGGGAATGTTCAACTCTGTGACTTGAATGCAGATATCACAAAGTACCTCCTGAGAGTGCTTCTGTCTAGATTTTATATGAAGATATTCCCGTTTCCAAGGAAATCGTCAGAG…
C18GPS2	chr18:15410211-15410636	425	ATGAATAGAAATGTTCAACTCTGGGAGATAAACGTACACATCACAAAGAAGTTTCTCAGGTTGCTTCTGTCTAGATTTTATGTGAAGATATTTCATTTTCTACCAAAGGCCGCAAAGTGCTCCAAATGTCCTCTTGCAGATTCTACAAAAAGGGTGTTTCCAACCTGGTCCACCAAAAGAAAAGTTCAATTCTCTGAGATGAACGCACGCGTCACAAAAAAGTTTCTCAGAATTTTTCTGTCTCGTTTTTATGTGAAGGTATTTCCTTTTCCACCATTGGCCGCAATGTGCTCAAAATGTCCACTTGCAGATTCTACAAAAATAGAGTTTCCAAACTGCCCCATCAAAAGAAAGCTCTCACTCTGTGAGTTGAATGCACGCATCAAAAAGACGTTTCTC…
C19GPS	chr19:27769363-27770187	824	ATGCTTCTGACTAGTTTTTATGTGAAGATATTCACGTTTCCGACAAACTCTTCAAAGCACCCCAAATATCCACTTGCAGAATCTACAAAAAGAGTGTTTCAAAACTGCTCTATCAAAAGGAGGCTTCAACTCTGTAGGTTGAATGCACACATCAAGAAGAAGTTTCTGAGAATGTTTCCATCTAGTTCTTATGTGATGTTATTCCCGTCTCCAATGAAGTCTTCAAAGCACTCCAAATATACAGTTGCAGATTCTACAAAAAGAGTGTTTAAAAACTGCTGTATCAAAAGAAAGGTTCAAATCTGTGAGTTGTATACACACATCACAAAGAAGTTTCTGAGAATGCTTCTATCTAGTTTTTATGTGAAGATATTTCCGTTTCTAATGAAGGCTTCAAAG…
C20GPS	chr20:26311184-26311576	392	ATGAAAAGGTGTGTTCAAATCTGTGAGTTGAAGGCAAACATCACAAAGAAGATTTTGAGAATGCTTCTGTCTAGTTTTTATGTGAAGATATTCCCGTTTCCAAGGAAAGATTCAAAGCTGTCCAAATATCCACTTGCAGATTCTACAAGAAGAATGTTTCAGAACTGCTCTATCAAAAGAAAGTTTCAGCTCTGTAAGTTGAGTATACGCATCACAAAGAAGTTTCTGAGAATAATTCTGTCTAGTTTTTATATGAAGATATTCCCGCTTCCTGCGAAGGCCTCAAAGCTGTCCAAATATCCACTAGCAAATTCTACAAAAAGTGTGTTTCAAATCTGGTCTATCAAAAGAAAATTTCAACTCTGTGAGTTGAATGCACACATCACAAAGTAG
C21GPS	chr21:14367017-14367241	224	ATGAGAAAGCTTCTGTCTAGTGTTTATGTGAAGATATTCCCGTTTCCAAGGAATGCCTCAAAGCGGTCCAAATATCCACTTGCAGATTCTACTAAAAGAGTGACTCAAAACTGCTCTATGGTAAAGTATTTTCAACTCTGTGAGTGGAATGCAAACATCACAAAGACGTTTCTGAGAATGCTTCTTTCTAGTTTTTCAGTGAAGATATTTCCTTTTCCACTATAG
CXGPS1	chrX:61766357-61767016	659	ATGTCCACTTGCAGATTCTACAAAAAGGAGGTTTCAAAACTGCTCTATCAAAAGAGAGTTTCAACTCTGTGCGTTGAATGCACACATCACAAAGTGGTTTCTGAGAATGCTTCTAATTTTTATGTGAAGATATTTAATATTTCACCATTGGCATCAAAGTGCTACAAATGTCCACTTGCAGATTCTGCAAAAAGAGGGTTTCAAAACTGCTCTTTCAAAAGAATAGTTCAATTCTGTGAGTTGAAGGCACACATCAGAAAGAAGTTTCTGAGAATGCTTCTGTCGAGTTTCTGTGAAGATATCCCTTTTCCAGCAAAGGCCTCAAAGCCTTCCAAATATCCACATGCAAATTCTACAAAAACAGTGTTTCAAAACTGCTCTATGAAAAGGAATGTTCAA…
CXGPS2	chrX:58560699-58561181	482	ATGCTTCACTCTAGTTTTTATGTGATGATATTTCCTTTTCCACCACAGAGCACAAAGCGCTCCACATGTCCACTTGCAGATTCTACGAAAAGAATGTTTCAAAACTGCTCTATGAAAAGCAATGTTAAACTCTGTGGCTCAAATACAAATATCACAAAAGAGTTTCTGAGAATGCTTCAGTTTAGTTTTTCTGTGAAGACATTTCCGTTTCCAAAGAAATCTTCAAAGAGGTCCACATATCCACTTACAGATTATACAAAAAGAGAGTTTCAAAACGGCTCAATCAAAAGGAAGGTTCAACTCTCTGACTTGAATGCAATCATCACACAGAAGTTTCTGAGAATGCTTCTCTTTGGTTTTTACTTGAAGATATACCCGTTTCGTTCGAAGGCCACCCAA…
CYGPS1	chrY:13129736-13130029	293	ATGCTTCTGTGTAGTTTTTATGTGAAGATATTTCCTTTTCCACAACAGGCCTCAAGGTGCTCCAAATATCCACTTGCAGATTTCACTAAAAGTGTGTTTCCAAGCTGCTCAATCAAGAGGAAGTTTCAAGTCTGTGAGGTGAATGCACACATTACAAAGAAGTTACTGAGAATGCTTCTGTGTAGTTTTTATGTGAAGATATTTCCTTTTCCACCGCAGGCCTCAAAGCGCTGCAAATATCCACTTGCAGATTCTACAAAAAGAGAGTTTCAAAACTGCTGTATCAAAAGATAG
CYGPS2	chrY:13122252-13122545	293	ATGCTTCTGTGTAGTTTTTATGTGAAGATATTTCCTTTTCCACAACAGGCCTCAAGGTGCTCCAAATATCCACTTGCAGATTTCACTAAAAGTGTGTTTCCAAGCTGCTCAATCAAGAGGAAGTTTCAAGTCTGTGAGGTGAATGCACACATTACAAAGAAGTTACTGAGAATGCTTCTGTGTAGTTTTTATGTGAAGATATTTCCTTTTCCACCGCAGGCCTCAAAGCGCTGCAAATATCCACTTGCAGATTCTACAAAAAGAGAGTTTCAAAACTGCTGTATCAAAAGATAG
CYGPS3	chrY:13116290-13116583	293	ATGCTTCTGTGTAGTTTTTATGTGAAGATATTTCCTTTTCCACAACAGGCCTCAAGGTGCTCCAAATATCCACTTGCAGATTTCACTAAAAGTGTGTTTCCAAGCTGCTCAATCAAGAGGAAGTTTCAAGTCTGTGAGGTGAATGCACACATTACAAAGAAGTTACTGAGAATGCTTCTGTGTAGTTTTTATGTGAAGATATTTCCTTTTCCACCGCAGGCCTCAAAGCGCTGCAAATATCCACTTGCAGATTCTACAAAAAGAGAGTTTCAAAACTGCTGTATCAAAAGATAG
CYGPS4	chrY:10101043-10101336	293	ATGCTTCTGTGTAGTTTTTATGTGAAGATATTTCCTTTTCCACAACAGGCCTCAAGGTGCTCCAAATATCCACTTGCAGATTTCACTAAAAGTGTGTTTCCAAGCTGCTCAATCAAGAGGAAGTTTCAAGTCTGTGAGGTGAATGCACACATTACAAAGAAGTTACTGAGAATGCTTCTGTGTAGTTTTTATGTGAAGATATTTCCTTTTCCACCGCAGGCCTCAAAGCGCTGCAAATATCCACTTGCAGATTCTACAAAAAGAGAGTTTCAAAACTGCTGTATCAAAAGATAG
CYGPS5	chrY:10086571-10086864	293	ATGCTTCTGTGTAGTTTTTATGTGAAGATATTTCCTTTTCCACAACAGGCCTCAAGGTGCTCCAAATATCCACTTGCAGATTTCACTAAAAGTGTGTTTCCAAGCTGCTCAATCAAGAGGAAGTTTCAAGTCTGTGAGGTGAATGCACACATTACAAAGAAGTTACTGAGAATGCTTCTGTGTAGTTTTTATGTGAAGATATTTCCTTTTCCACCGCAGGCCTCAAAGCGCTGCAAATATCCACTTGCAGATTCTACAAAAAGAGAGTTTCAAAACTGCTGTATCAAAAGATAG
CYGPS6	chrY:10043759-10044010	251	ATGAATGCACACATCACAAAAAAGTTTCTCAGAAAGCTTCCATTTAGTTTTTATGTGAAGATATTTCCTTTTTTACCATGGGCCTCAAAGTGCTCCAAATATCCATTTGCAGATTCTACAAAAAGAGTATTTCCAAACTGCTCAATCAAAAGAGAGGTTCAACTCTGTGAGATGGAAGCACAGATCACAAAGAAGTTTCTTAGAAACCTTCAGTCTAGTTTTTATGGGAAGATATTTCATATTTCACCATAG
